# Supplementary material
Source: publisher site journal article supplement (https://www.dovepress.com/article/265037)
Supplement: Supplementary file 1 [file get_supplementary_file.php]

**Supplementary Table 1** Percentage of patients classified to each GOLD grade according to CAT or mMRC score by treatment cohort

|  | **GOLD A** | | **GOLD B** | | **GOLD C** | | **GOLD D** | |
| --- | --- | --- | --- | --- | --- | --- | --- | --- |
|  | **UMEC/VI** | **FP/SAL** | **UMEC/VI** | **FP/SAL** | **UMEC/VI** | **FP/SAL** | **UMEC/VI** | **FP/SAL** |
| **CAT** | 11.7 | 9.8 | 65.1 | 66.0 | 1.5 | 1.5 | 21.7 | 22.7 |
| **mMRC** | 43.4 | 37.3 | 33.4 | 38.5 | 8.4 | 9.6 | 14.8 | 14.6 |

CAT, COPD Assessment Test; COPD, chronic obstructive pulmonary disease; FP/SAL, fluticasone propionate/salmeterol; GOLD, Global Initiative for Obstructive Lung Disease; mMRC, modified Medical Research Council dyspnea scale; UMEC/VI, umeclidinium/vilanterol
